# Supplementary material
Source: PubMed Central journal article supplement (PMC6005736)
Supplement: NIHMS940906-supplement-Table_S1.pdf [file NIHMS940906-supplement-Table_S1.pdf]

| Transcript ID | Gene Symbol  | Accession        | Gene Name                                                                              | FDR corrected p-value | FDR corrected p-value | Fold-Change in Expres | FDR corrected p-value | Fold-Change in Expres | FDR corrected p-value | Fold-Change in Expres | Log2 transform Log2 transform | Log2 transformed Mean 9- |
|---------------|--------------|------------------|----------------------------------------------------------------------------------------|-----------------------|-----------------------|-----------------------|-----------------------|-----------------------|-----------------------|-----------------------|-------------------------------|--------------------------|
| 17324745      | Bex6         | NM_001033539     | brain expressed gene 6                                                                 | 0.00158259            | 0.00186318            | -7.33049              | -4.59099              | 0.393685              | 1.59671               | 8.5491                | 5.67519                       | 6.30209                  |
| 17344126      | Hspa1b       | NM_010478        | heat shock protein 1B                                                                  | 0.00208463            | 0.00228411            | -3.85817              | -2.78074              | 0.403457              | 1.38746               | 8.77829               | 6.83037                       | 7.30282                  |
| 17257593      | ---          | ---              | ---                                                                                    | 0.0140458             | 0.0273696             | -2.48142              | -2.89427              | 0.00594557            | 0.815002              | -1.16638              | 7.24871                       | 5.93755                  |
| 17365098      | Scd1         | NM_009127        | stearoyl-Coenzyme A desaturase 1                                                       | 0.0114199             | 0.0105895             | -2.19999              | -0.0129642            | 0.635346              | 1.19917               | 10.345                | 9.20749                       | 9.46953                  |
| 17311711      | Sqa          | NM_009270        | squalene epoxidase                                                                     | 0.00316021            | 0.00345023            | -2.09513              | -2.4347               | 0.332478              | 1.16865               | 11.0891               | 10.261                        | 9.7326                   |
| 17445308      | Cyp51        | ENSMUST000000015 | cytochrome P450, family 5                                                              | 0.00141668            | 0.0019657             | -2.04547              | -0.0017132            | 0.718271              | 1.09005               | 9.8821                | 8.84968                       | 8.97408                  |
| 17234552      | Lss          | ENSMUST000000046 | lanosterol synthase                                                                    | 0.0026575             | 0.00325504            | -2.00389              | -0.00218414           | 0.708404              | 1.10324               | 9.70831               | 8.7055                        | 8.84725                  |
| 17509629      | Sc4mol       | ENSMUST000000034 | sterol-C4-methyl oxidase-like                                                          | 0.000572807           | 0.00125104            | -2.00125              | 0.000280112           | 0.852846              | -1.04316              | 9.9685                | 8.7656                        | 8.90664                  |
| 17349549      | Mir1949      | NC_035472        | microRNA 1949                                                                          | 0.000114828           | 0.000698481           | -1.98977              | -2.94092              | 0.0128809             | -1.47802              | 9.97852               | 8.98592                       | 8.42225                  |
| 17280836      | Gm889        | BC147387         | predicted gene 889                                                                     | 0.00470562            | 0.00894228            | -1.94203              | 0.00223215            | 0.907509              | -1.04847              | 8.73268               | 7.77512                       | 7.70683                  |
| 17307623      | Btk          | NM_007549        | B lymphoid kinase                                                                      | 0.00305562            | 0.012607              | -1.92455              | 0.00104165            | -2.5523               | 0.317287              | -1.32618              | 9.87388                       | 8.92936                  |
| 17307588      | Fdft1        | NM_010191        | farnesyl diphosphate farnesyl transferase 1                                            | 0.00148624            | 0.00272067            | -1.91859              | 0.000726644           | -1.97777              | 0.923597              | -1.03084              | 11.4427                       | 10.5027                  |
| 17406921      | ---          | ---              | ---                                                                                    | 0.00213029            | 0.00255807            | -1.88603              | 0.00198384            | -1.86628              | 0.939687              | -1.11846              | 8.92631                       | 8.01096                  |
| 17344122      | ---          | ---              | ---                                                                                    | 0.0020357             | 0.00670063            | -1.87296              | 0.000711367           | -2.26942              | 0.95307               | 10.756                | 9.85072                       | 9.55665                  |
| 17456772      | Fam40b       | NM_177204        | family with sequence similarity 40, member B                                           | 0.0169496             | 0.0215981             | -1.84721              | 0.0104276             | -1.80436              | 0.966032              | 10.02375              | 8.5691                        | 7.71761                  |
| 17344120      | Snord52      | NR_028527        | small nuclear RNA, C/D box 52                                                          | 0.00120919            | 0.00477817            | -1.81659              | 0.000429456           | -2.23537              | 0.293177              | -1.23053              | 7.75241                       | 6.89118                  |
| 17548102      | Cyts         | NM_007808        | cytochrome c, somatic                                                                  | 0.00208463            | 0.0054984             | -1.80698              | 0.000809107           | -2.05337              | 0.586689              | -1.36305              | 8.55414                       | 8.70056                  |
| 17548541      | Cyts         | NM_007808        | cytochrome c, somatic                                                                  | 0.00208463            | 0.0054864             | -1.80698              | 0.000809107           | -2.05337              | 0.586689              | -1.13635              | 9.55414                       | 8.70056                  |
| 17429632      | Mfsd2a       | NM_029662        | major facilitator superfamily domain containing 2A                                     | 0.00292244            | 0.00756383            | -1.79145              | 0.00115108            | -2.03065              | 0.625737              | -1.13352              | 8.44391                       | 7.60278                  |
| 17515315      | Ldlr         | NM_010700        | low density lipoprotein receptor                                                       | 0.00214274            | 0.00554298            | -1.78586              | 0.000843793           | -2.01483              | 0.608755              | -1.12821              | 10.665                        | 9.8284                   |
| 17239755      | ---          | ---              | ---                                                                                    | 0.00378979            | 0.0169631             | -1.78358              | 0.00127242            | -2.32385              | 0.316673              | -1.30628              | 8.49588                       | 7.6611                   |
| 17379871      | 1500012F01R1 | ENSMUST000001383 | RIKEN cDNA 1500012F01 gene                                                             | 0.00952348            | 0.0221727             | -1.78219              | 0.00333131            | -2.19481              | 0.55179               | -1.23153              | 8.98913                       | 8.15548                  |
| 17347448      | Cyp11b1      | NM_009994        | cytochrome P450, family 1, subfamily b, polypeptide 1                                  | 0.000851483           | 0.00138491            | -1.74606              | 0.000489049           | -1.67507              | 0.818192              | 10.4238               | 6.65278                       | 5.84868                  |
| 17505454      | ---          | ---              | ---                                                                                    | 0.00104124            | 0.006552              | -1.7441               | 0.000336768           | -2.40136              | 0.108702              | -1.37685              | 9.56971                       | 8.76722                  |
| 17406908      | Fdps         | NM_001253751     | farnesyl diphosphate synthetase                                                        | 0.00281772            | 0.00381661            | -1.71251              | 0.00210697            | -1.61226              | 0.788722              | 10.2528               | 11.2767                       | 11.3638                  |
| 17416325      | Dhcr24       | NM_053272        | 24-dehydrocholesterol reductase                                                        | 0.000460707           | 0.00125104            | -1.69904              | 0.000172322           | -1.84433              | 0.548419              | -1.08551              | 11.4682                       | 10.7035                  |
| 17290173      | Hmgcs1       | NM_0194626       | 3-hydroxy-3-methylglutaryl-Coenzyme A synthase 1                                       | 0.0194626             | 0.0231986             | -1.66754              | 0.0215167             | -1.61855              | 0.03027               | 11.7602               | 11.0225                       | 11.0655                  |
| 17218853      | Gas5         | NR_002840        | growth arrest specific 5                                                               | 0.00284469            | 0.00531941            | -1.6635               | 0.00138641            | -1.71731              | 0.885995              | -1.03859              | 7.94447                       | 7.88964                  |
| 17291854      | Rpp40        | ENSMUST000001716 | ribonuclease P 40 subunit (human)                                                      | 0.00195662            | 0.00408016            | -1.6511               | 0.000625627           | -1.81993              | 0.60762               | -1.1022               | 7.89614                       | 7.17271                  |
| 17523158      | Ccr8         | NM_007720        | chemokine (C-C motif) receptor 8                                                       | 0.0105598             | 0.0184646             | -1.64633              | 0.00469506            | -1.74329              | 0.871242              | -1.0589               | 9.95839                       | 9.23914                  |
| 17535434      | Nsdh1        | NM_010941        | NAD(P) dependent steroid dehydrogenase-like                                            | 0.0210565             | 0.041892              | -1.62866              | 0.00861701            | -1.8                  | 0.79588               | -1.1052               | 11.5338                       | 10.8301                  |
| 17440812      | Ung          | ENSMUST00001025u | uracil DNA glycosylase                                                                 | 0.00141688            | 0.00508196            | -1.62221              | 0.000513471           | -1.89276              | 0.35639               | -1.16677              | 8.70983                       | 8.01096                  |
| 17222900      | Scts3b10     | ENSMUST000000271 | solute carrier family 39 (zinc transporter), member 10                                 | 0.0548836             | 0.0177669             | -1.61642              | 0.00187219            | -1.91869              | 0.48185               | -1.187                | 9.19221                       | 8.498                    |
| 17295233      | Hmgcr        | NM_008255        | 3-hydroxy-3-methylglutaryl-Coenzyme A reductase                                        | 0.00037293            | 0.000885942           | -1.61557              | 0.000167255           | -1.65871              | 0.854342              | -1.02671              | 12.0097                       | 11.3177                  |
| 17285056      | Idi1         | NM_145360        | isopentenyl-diphosphate delta isomerase                                                | 0.000319201           | 0.00119214            | -1.61548              | 0.000110368           | -1.83259              | 0.228051              | -1.13439              | 10.0878                       | 10.3958                  |
| 1729466       | Hsd17b7      | NM_010476        | hydroxysteroid (17-beta) dehydrogenase 7                                               | 0.00180875            | 0.00477206            | -1.6134               | 0.000715979           | -1.72716              | 0.614584              | -1.0984               | 9.24596                       | 8.42044                  |
| 17233863      | Icdh1        | NM_001113320     | isocitrate dehydrogenase 1 (NADP+), soluble                                            | 0.00654201            | 0.00819822            | -1.60528              | 0.0016562             | -1.55719              | 0.919469              | 10.93088              | 10.4366                       | 9.75373                  |
| 17435475      | Insig1       | NM_153525        | insulin induced gene 1                                                                 | 0.00593369            | 0.00560964            | -1.60416              | 0.00912806            | -1.39698              | 0.425645              | -1.148                | 10.7982                       | 9.9977                   |
| 17364725      | Rps12        | NM_193417        | ribosomal RNA processing 12 homolog (S. cerevisiae)                                    | 0.00387186            | 0.0118273             | -1.60387              | 0.00193427            | -1.87371              | 0.456833              | -1.172                | 8.99987                       | 8.3228                   |
| 17421694      | Srm          | NM_009272        | spermidine synthase                                                                    | 0.000354355           | 0.00166949            | -1.5965               | 0.000110368           | -1.96059              | 0.0824874             | -1.22806              | 11.6227                       | 10.8478                  |
| 17305980      | Ccnb1ip1     | NM_001111119     | cyclin B1 interacting protein 1                                                        | 0.000851483           | 0.00205744            | -1.59228              | 0.000305368           | -1.75214              | 0.49083               | -1.1004               | 7.51664                       | 6.84555                  |
| 17518314      | ---          | ---              | ---                                                                                    | 0.00216582            | 0.0114178             | -1.58966              | 0.00071241            | -2.02006              | 0.203596              | -1.27075              | 8.26164                       | 7.24724                  |
| 17362050      | Rps6ka4      | NM_019924        | ribosomal protein S6 kinase, polypeptide 4                                             | 0.0095345             | 0.0102085             | -1.57325              | 0.0078907             | -1.47591              | 0.798321              | 10.0695               | 8.40317                       | 7.74943                  |
| 17345795      | Bysl         | NM_016859        | lysin-like                                                                             | 0.0042867             | 0.00849395            | -1.57092              | 0.00084628            | -1.67243              | 0.785355              | -1.06462              | 8.27701                       | 8.5302                   |
| 17550390      | ---          | ---              | ---                                                                                    | 0.00225426            | 0.00500392            | -1.57007              | 0.00079125            | -1.67173              | 0.743137              | -1.06475              | 10.7401                       | 9.68932                  |
| 17353358      | Stard4       | ENSMUST000000252 | STAR-related lipid transfer (START) domain containing 4                                | 0.0122649             | 0.0128042             | -1.56525              | 0.00992187            | -1.47024              | 0.815074              | 1.06643               | 9.06512                       | 8.41872                  |
| 17344132      | Hspa1a       | ENSMUST000000873 | heat shock protein 1A                                                                  | 0.0493048             | 0.0386626             | -1.56121              | 0.0944021             | -1.32975              | 0.58646               | -1.17406              | 7.19895                       | 6.55629                  |
| 17442719      | Aacs         | ENSMUST000000314 | acetyl-CoA synthetase                                                                  | 0.00082026            | 0.00179125            | -1.5585               | 0.000294249           | -1.67379              | 0.58646               | 9.96672               | 9.02256                       | 8.9196                   |
| 17301247      | Pirn1        | NM_026228        | PIN2/TERF1 interacting, telomerase inhibitor 1                                         | 0.0023485             | 0.00629712            | -1.55208              | 0.000922604           | -1.71709              | 0.582929              | -1.10596              | 9.89398                       | 9.26471                  |
| 17427903      | Pthn         | ENSMUST000000522 | parathyroid hormone-like peptide                                                       | 0.00581483            | 0.00584947            | -1.55152              | 0.00022063            | -2.04757              | 0.0750468             | -1.3199               | 8.2268                        | 7.78929                  |
| 17376096      | Polr1b       | NM_009086        | polymerase (RNA) I polypeptide B                                                       | 0.00195718            | 0.00610308            | -1.54927              | 0.000703384           | -1.76023              | 0.441104              | -1.13616              | 10.0298                       | 9.38819                  |
| 17490599      | Rps11        | NM_013725        | ribosomal protein S11                                                                  | 0.00931748            | 0.0258573             | -1.54753              | 0.00335969            | -1.78074              | 0.586842              | -1.1507               | 10.1095                       | 9.47957                  |
| 17480636      | Lip2         | ENSMUST000000329 | lipoy(octanoyl) transferase 2 (putative)                                               | 0.00079223            | 0.0014064             | -1.54596              | 0.000309033           | -1.58125              | 0.888423              | -1.02283              | 9.5527                        | 8.9242                   |
| 17279190      | Trm61a       | NM_173734        | tRNA methyltransferase 61 homolog A (S. cerevisiae)                                    | 0.00986652            | 0.0218782             | -1.54222              | 0.00376106            | -1.70026              | 0.713839              | -1.10248              | 9.14301                       | 8.518                    |
| 17437072      | Lyar         | NM_025281        | Lyt1 antibody reactive clone                                                           | 0.000460707           | 0.00136491            | -1.53944              | 0.000163223           | -1.68586              | 0.391795              | -1.09511              | 10.1465                       | 9.52404                  |
| 17319405      | Snord43      | NR_028281        | small nuclear RNA, C/D box 43                                                          | 0.0010542             | 0.00587896            | -1.51936              | 0.000350967           | -1.87934              | 0.136867              | -1.23693              | 7.60326                       | 6.9998                   |
| 17394063      | Ada          | ENSMUST000000178 | adenosine deaminase                                                                    | 0.0050235             | 0.0164881             | -1.51748              | 0.00174762            | -1.75846              | 0.476416              | -1.1588               | 9.2401                        | 6.83843                  |
| 17276520      | Mhfd1        | NM_138745        | methylene tetrahydrofolate dehydrogenase (NADP+ dependent), methenyltetrahydrofolate c | 0.000446191           | 0.0025344             | -1.51489              | 0.000130101           | -1.89582              | 0.0607019             | -1.25146              | 11.0016                       | 10.4024                  |
| 17236373      | Shmt1        | ENSMUST000000187 | serine hydroxymethyltransferase 1 (soluble)                                            | 0.000851483           | 0.00387421            | -1.51387              | 0.000282063           | -1.8391               | 0.128258              | -1.21484              | 10.4406                       | 9.84234                  |
| 17439878      | Cad          | ENSMUST000000137 | carbamoyl-phosphate synthetase 2, aspartate transcarbamylase, and ditydroorotase       | 0.00011807            | 0.000596212           | -1.51309              | 4.10E-05              | 0.0789267             | 1.13302               | 10.6548               | 10.0573                       | 8.97713                  |
| 17530669      | Acp1         | NM_025371        | acyl-CoA synthetase 1                                                                  | 0.00732517            | 0.0142035             | -1.50854              | 0.00302632            | -1.81375              | 0.707775              | -1.06974              | 8.67384                       | 8.00969                  |
| 17463108      | Nop2         | NM_138747        | NOP2 nucleolar protein homolog (yeast)                                                 | 0.000468005           | 0.00148523            | -1.50599              | 0.000162508           | -1.67526              | 0.282889              | -1.11239              | 11.2424                       | 10.6517                  |
| 17408483      | Ptgrm        | ENSMUST000001026 | prostaglandin F2 receptor negative regulator                                           | 0.0014939             | 0.0105447             | -1.50166              | 0.000489049           | -1.93036              | 0.123495              | -1.28548              | 7.74038                       | 7.15382                  |
| 17526929      | 1110032A03R1 | NM_023483        | RIKEN cDNA 1110032A03 gene                                                             | 0.00072128            | 0.00186318            | -1.50259              | 0.00026789            | -1.65712              | 1.10285               | 8.97513               | 9.56316                       | 9.70439                  |
| 17285834      | Hist1h2bg    | NM_178196        | histone cluster 1, H2bg                                                                | 0.0186052             | 0.0329841             | -1.51234              | 0.00830266            | -1.60026              | 0.86779               | 10.0814               | 10.1634                       | 9.1634                   |
| 17391521      | A1847159     | NR_045264        | expressed sequence A1847159                                                            | 0.0171616             | 0.0171616             | -1.51188              | 0.05220815            | 1.56051               | 1.02746               | 8.94228               | 7.89716                       |                          |
